1 **Seeing the World Like Never Before: Human stereovision through perfect optics**

2 Cherlyn J Ng<sup>1,2</sup>, Randolph Blake<sup>3</sup>, Martin S Banks<sup>4\*</sup>, Duje Tadin<sup>5,2,1</sup>, Geunyoung

3 Yoon<sup>1,2\*</sup>

4

5 <sup>1</sup> Flaum Eye Institute, University of Rochester, NY, United States

6 <sup>2</sup> Center for Visual Science, University of Rochester, NY, United States

7 <sup>3</sup> Department of Psychology, Vanderbilt University, TN, United States

8 <sup>4</sup> School of Optometry, University of California, Berkeley, CA, United States

9 <sup>5</sup> Brain and Cognitive Science, University of Rochester, Rochester, NY, United States

10 \* corresponding authors: [gyoon@ur.rochester.edu](mailto:gyoon@ur.rochester.edu); [martybanks@berkeley.edu](mailto:martybanks@berkeley.edu)

11

12

13 Keywords: Stereovision, adaptive optics, adaptation, interocular difference, optical

14 aberrations

15

16

17

18

19

20

21

22

23

24 **Abstract**

25 Stereovision is the ability to perceive fine depth variations from small differences in the  
26 two eyes' images. Using adaptive optics, we show that even minute optical aberrations  
27 that are not clinically correctable, and go unnoticed in everyday vision, can affect stereo  
28 acuity. Hence, the human binocular system is capable of using unnaturally fine details  
29 that are not encountered in everyday vision. More importantly, stereoacuity was still  
30 considerably variable even with perfect optics. This variability can be attributed to neural  
31 adaptation. Our visual system tries to compensate for these aberrations through neural  
32 adaptation that optimizes stereovision when viewing stimuli through one's habitual optics.  
33 However, the same adaptation becomes ineffective when the optics are changed, even if  
34 improved. Beyond optical imperfections, we show that stereovision is limited by neural  
35 adaptation to one's own optics.

36

37 **Significance statement**

38 Humans, and animals with front-facing eyes, view the world from slightly different vantage  
39 points. This creates small differences in the left and right images that can be utilized for  
40 fine depth perception (stereovision). Retinal images are also subject to imperfections that  
41 are often different in the optics of the two eyes. Using advanced optical correction  
42 techniques, we show that even the smallest imperfections that escape clinical detection  
43 affect stereovision. We also find that neural processes become adapted to a person's  
44 own optics. Hence, stereovision is directly impacted by the optics of the eyes, and  
45 indirectly via neural adaptation. Since the optics change over the lifespan, our results

46 imply that the adult binocular system is adaptable with possibilities for binocular  
47 rehabilitation.

48

## 49 **Introduction**

50 Many of us have refractive errors that degrade the quality of the images formed on  
51 our retinas, the most common errors being myopia, hyperopia, and astigmatism. If  
52 uncorrected, these optical defects can compromise everyday activities such as visually  
53 guided behavior and reading. Collectively known as lower-order aberrations, these  
54 defects are easily corrected with spectacles or contact lenses. In addition, we all have  
55 other optical aberrations that cannot be so easily corrected. These defects---higher-order  
56 aberrations---also degrade retinal images [1]. We are not aware of these residual native  
57 aberrations because our everyday experience provides no basis for knowing what the  
58 world would look like if those aberrations were eliminated. This conundrum raises a  
59 fascinating, albeit modest version of Molyneux's problem [2]: What would the world look  
60 like if a person were able to see the world through eyes with perfect optics? Answering  
61 this question will specify the degree to which the higher-order aberrations, as well as the  
62 small amounts of residual lower-order ones, limit human visual function and, in turn,  
63 reveal the extent to which the visual nervous system can utilize spatial information never  
64 before encountered.

65 This question can be answered using adaptive optics (AO). AO is a technique that  
66 measures optical wavefront distortions through the pupil of the eye and compensates by  
67 setting a complementary shape on a deformable mirror that reflects visual stimuli into the  
68 eye to achieve near perfect, diffraction-limited retinal images [3]. Previous work has

69 shown that removing higher-order aberrations yields significant improvements in visual  
70 acuity and contrast sensitivity [4-7]. This previous work dealt with monocular vision but  
71 humans are intrinsically binocular and the question remains as to how aberrations of both  
72 eyes affect binocular vision. We utilized AO to examine human stereopsis, an aspect of  
73 binocular vision that exploits tiny positional differences in the two eyes' retinal images [8-  
74 10]. These positional differences---binocular disparities---are estimated in visual cortex  
75 and produce a compelling sensation of three dimensionality [11, 12]. As precise  
76 stereopsis derives from small differences between the two eyes, it may be especially  
77 susceptible to imperfections associated with optical aberrations, especially higher-order  
78 ones, because those aberrations typically differ in the two eyes.

79         Stereopsis, like other visual functions, is adversely affected by blur [13-15],  
80 particularly when the images to the two eyes differ in optical quality [16-18]. It is not  
81 uncommon that the two eyes have different spherical refractive errors (anisometropia and  
82 monovision are examples [19, 20]) and astigmatism of different magnitudes and axis.  
83 Even in well-focused eyes, higher-order aberration profiles are seldom the same in the  
84 two eyes [21].

85         Are there consequences of living with chronic and conventionally uncorrectable  
86 aberrations? We know that monocular images appear sharpest when they are presented  
87 with a person's native aberrations rather than other aberrations of the same magnitude.  
88 This observation strongly suggests that people adapt to the blur caused by their own  
89 optics [22-24]. Binocular adaptation to habitual optics also biases the cyclopean percept  
90 of blurriness [25]. Plausibly, stereopsis would capitalize on such adaptation too and  
91 thereby sharpen depth perception under habitually experienced conditions. This

92 explanation was cited in [26] as a reason for not observing improvement in stereo vision  
93 when optical aberrations were corrected.

94 With these points in mind, we investigated whether stereopsis is limited by the  
95 optics of the two eyes, and, as a follow up, whether the neural mechanisms underlying  
96 stereopsis become adapted to an individual's degraded retinal images. We pursued this  
97 by measuring stereoacuity when all eye aberrations were eliminated by AO correction, in  
98 comparison to measurements with native optics when the familiar lower and higher-order  
99 aberrations were in place. Improvement in AO-assisted stereopsis would be noteworthy  
100 because it would show that the brain can exploit greater image sharpness than ever  
101 experienced before (Figure 1).

102

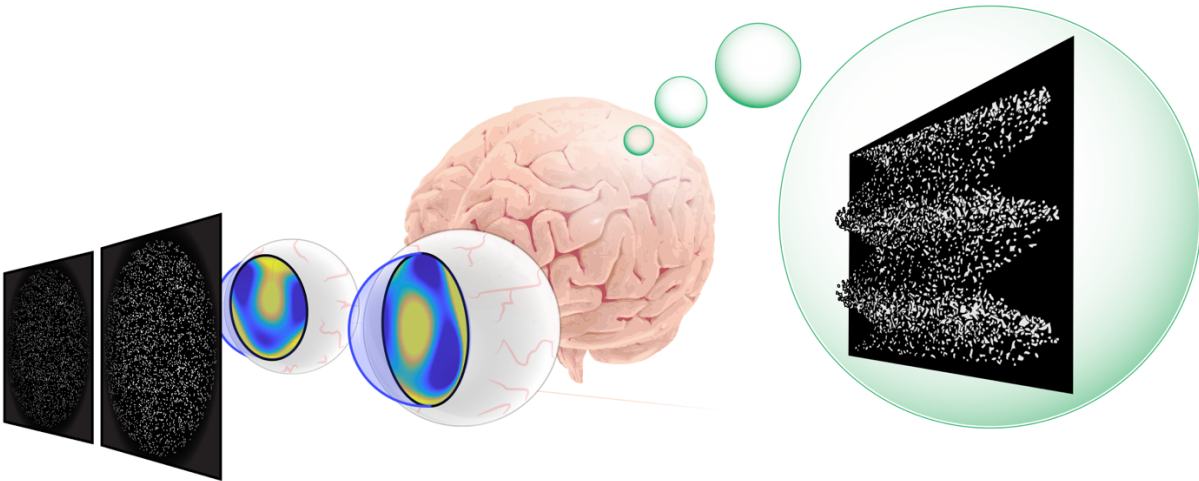

103

104 **Figure 1. Schematic of the paradigm.** The aim of the study was to elucidate the interplay between optics  
105 and neural adaptation in determining stereoacuity.

106

107

108

109 **Results**

110 **Visual acuity follows optical quality.** We first wanted to confirm that correcting the  
111 optical aberrations using AO yields improvement in monocular visual acuity where  
112 improvement was expected. We focused on monocular letter acuity because others had  
113 shown significant improvement in that task when aberrations are corrected by AO [4-6,  
114 27].

115 Figure 2A shows examples of an individual's aberrated wavefront pattern, and the AO-  
116 corrected pattern and the associated retinal images. Figure 2B plots visual acuity with  
117 and without AO correction. Note that native optics in our study always included the best  
118 conventional refractive correction (sphere and cylinder), if needed. The average acuities  
119 for the left eye improved with AO correction from 20/18 to 20/12.3 (an improvement of  
120 31.7%) and for the right eye from 20/17 to 20/11 (35.3% improvement). The  
121 improvements were statistically significant ( $t_{13} = 10.0$ ,  $p < 10^{-7}$ , one tailed, all eyes  
122 combined). Indeed, the corrected acuities approached limits set by photoreceptor spacing  
123 at the fovea [28, 29]. Participants reported that stimuli viewed with AO correction  
124 appeared unusually and surprisingly sharp. These results confirm that our AO correction  
125 substantially improves retinal-image quality.

126 Visual acuity with the native optics was highly correlated with image quality (Figure  
127 2C; Pearson  $r_{12} = -0.92$ ;  $p = 0.003$ ). This was entirely expected as it simply shows that  
128 those individuals with better native optics have better visual acuity. Surprisingly, we also  
129 found a similar degree of individual variability in the acuities measured under AO  
130 correction even though participants had essentially the same (near-perfect) image quality  
131 in that condition (Figures 2B and S1). Notably, the acuities with corrected optics were  
132 correlated with image quality before AO correction (Figure 2D; Pearson  $r_{12} = -0.90$ ;  $p =$

133 0.006): specifically, those with poor native optics also exhibited relatively poor visual  
 134 acuity under AO correction. We examine the implications of these intriguing observations  
 135 in the Discussion.

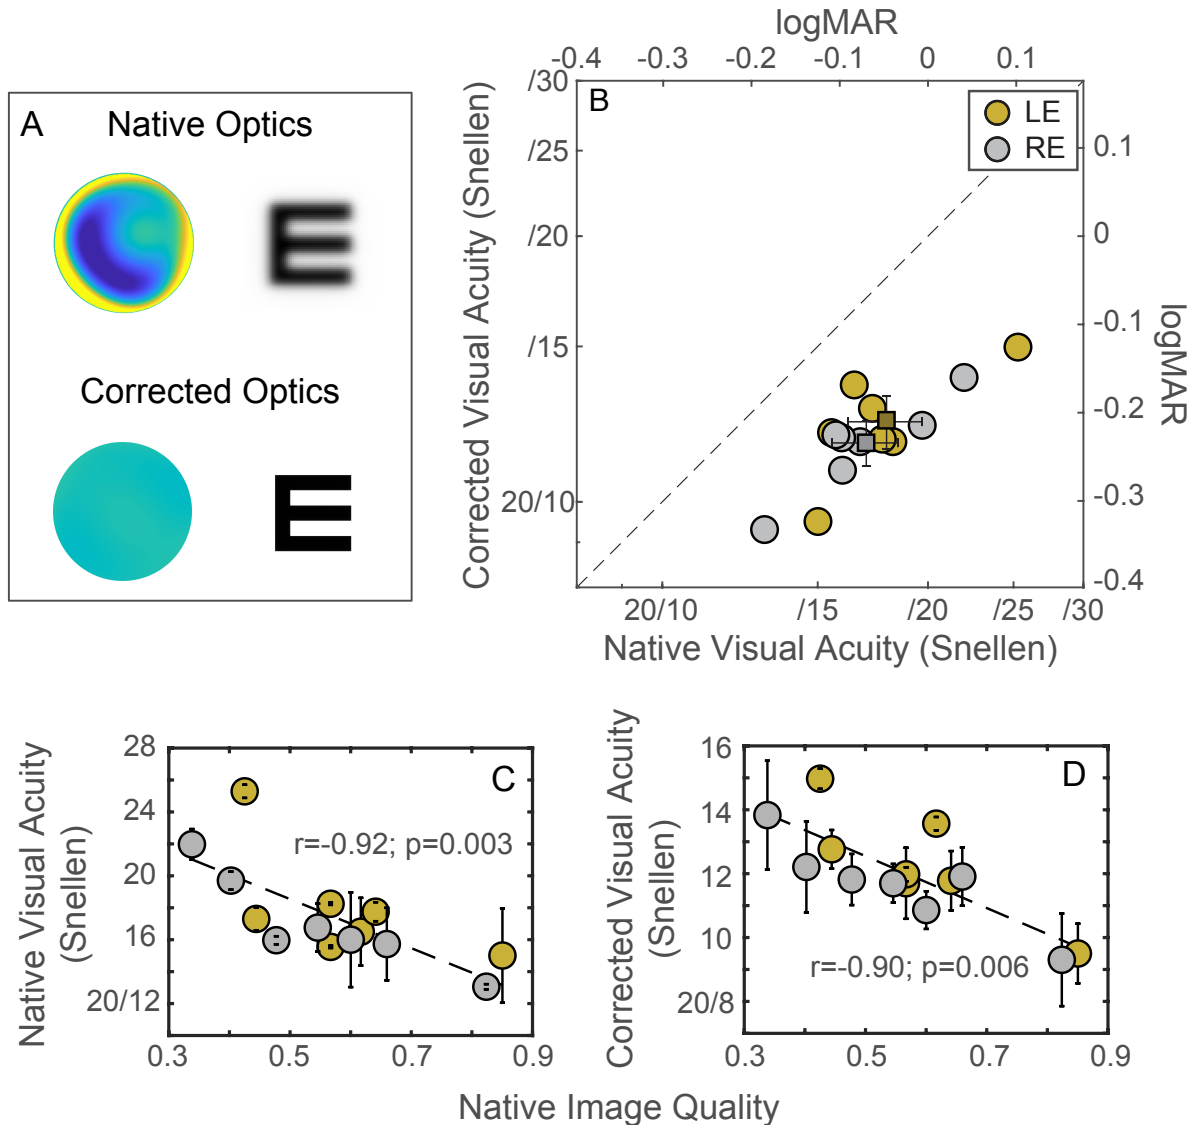

136

137 **Figure 2: Visual acuity and optical correction.** (A) Wavefronts and retinal images from the right eye of a  
 138 representative participant (S6). The left panels are maps of the wavefront drawn in the same color scale in  
 139 the native and corrected conditions. The color variation represents the distortion of the wavefront. The right  
 140 panels are simulations of the retinal images of a 20/20 Snellen letter E in the two conditions. (B) Monocular  
 141 visual acuity with native and corrected optics. Visual acuity with AO-corrected optics is plotted against acuity  
 142 with native optics for both eyes of all participants. Gold and silver symbols indicate the acuities for the left  
 143 and right eyes, respectively. The left and bottom axes are acuity in Snellen notation. The right and top axes  
 144 are the equivalent in logMAR units (logarithm of minimal angle of resolution in minutes of arc). The small  
 145 squares are the average values for the left and right eyes. (C) Native and (D) corrected visual acuity as a

146 function of native retinal-image quality, simulated by convolving individual eyes' PSFs with a 20/20 Snellen  
147 E (see Methods). All error bars indicate  $\pm 1SD$ .  
148

149 **Stereo acuity improves with optical correction.** We next turned to the main topic of  
150 investigation: How do the eyes' optics affect the precision of stereopsis? To answer that  
151 question, we measured the smallest disparity that allowed participants to identify the  
152 orientation of a disparity-defined depth corrugation ([30, 31]; Equations 1 and 2 in the  
153 Methods) with their native optics and with AO-corrected optics. Stereo acuity was  
154 measured at three corrugation frequencies: 1, 2, and 3cpd.

155 As can be seen in Figure 3B, there was a clear improvement in stereoacuity with AO  
156 correction at all three corrugation frequencies. The average improvement (small squares  
157 with error bars) was 30.0%, a statistically significant improvement ( $F_{1,36}=4.08$ ,  $p=0.050$ ;  
158 two-way repeated randomized-block ANOVA) and similar in magnitude to the  
159 improvement in visual acuity with AO correction (Figure 2). Stereo acuity increased with  
160 increasing corrugation frequency ( $F_{2,36}=14.96$ ,  $p<10^{-4}$ ), but the improvement with AO-  
161 corrected optics relative to native optics was similar at all frequencies (frequency x  
162 correction interaction:  $F_{2,36}=0.21$ ,  $p=0.81$ ).

163 Most participants did substantially better in the stereo test with corrected optics.  
164 However, as with visual acuity (Figure 2D), we found considerable individual differences  
165 in AO-corrected stereo acuity even though retinal-image quality was essentially the same  
166 for all of them in that condition. This includes one participant who performed slightly worse  
167 with AO correction than with native optics (the three data points above the identity line),  
168 which we will address later.

169



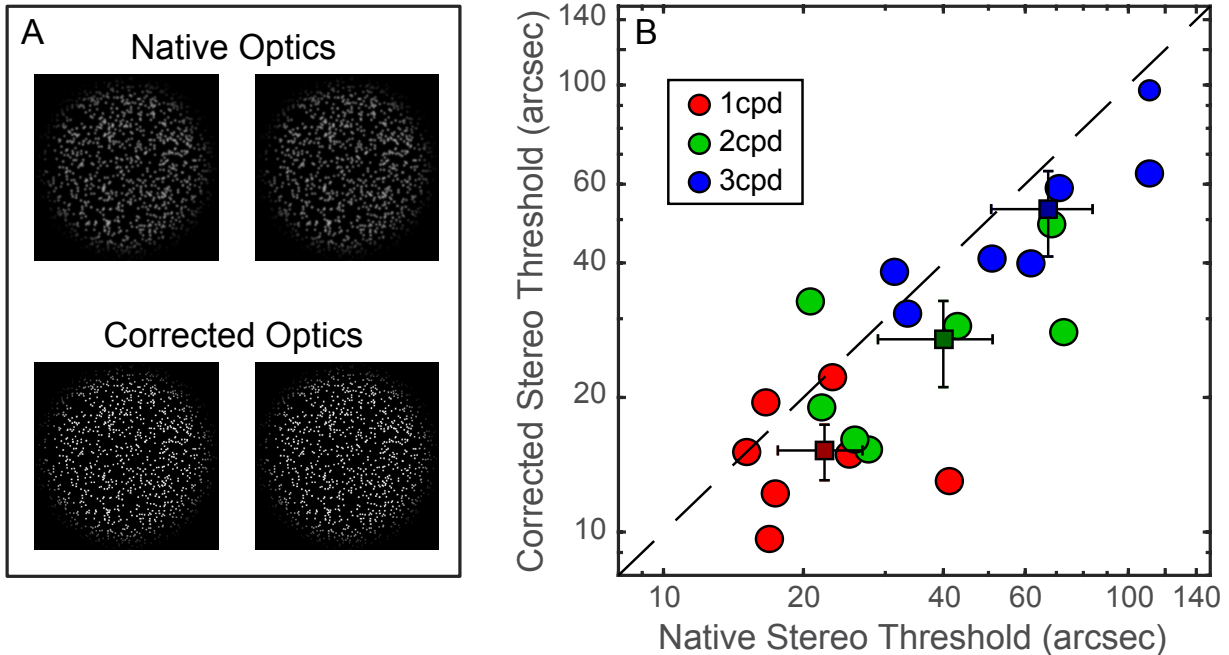

170

171 **Figure 3: Stereo thresholds and optical correction.** (A) Simulated retinal images, one for each eye of  
172 the random-dot stimulus, are depicted for the native- and AO-corrected-optics conditions. The reader can  
173 cross fuse to observe the depth corrugation. (B) Stereo thresholds with native and AO-corrected optics.  
174 The smallest discriminable disparity with correction is plotted against the smallest discriminable disparity  
175 with native optics for each participant and corrugation frequency (red for 1cpd, green for 2cpd, and blue for  
176 3cpd). The small squares are the average values for each frequency. Errors bars are standard deviations.  
177

178 **What causes individual differences in stereo threshold?** Previous studies have found  
179 significant individual differences in stereo acuity [32, 33]; we observed this with native  
180 optics (horizontal spread in Figure 3B), too. Why do people differ in this task? To tackle  
181 that question, we investigated whether peoples' native optical aberrations determined the  
182 individual differences. There are two possibilities. 1) Some people simply have better  
183 optics than others. Consequently, those with minimal higher-order aberrations, and hence  
184 better image quality, are able to perform better. This hypothesis is consistent with the  
185 observation that stereo acuity is better with sharp images in the two eyes than with blurred  
186 images [14, 34]. Our results show this too because stereo acuity with AO correction was  
187 generally better than acuity without AO correction (Figure 3B). 2) Alternatively, individual

188 differences in stereo acuity might largely derive from interocular differences in the  
189 aberrations. This hypothesis is suggested by the *blur paradox*: i.e., stereo acuity is  
190 actually better when both eyes' images are equivalently blurred compared to when only  
191 one eye's image is blurred and the other eye's image is not blurred. The blur paradox  
192 implies that the binocular matching required to see depth from disparity is dependent on  
193 having images of equivalent contrast energy and spatial-frequency content in the two  
194 eyes. We next sought to determine which of the two hypotheses is the better predictor of  
195 stereo acuity across individuals.

196 We simulated what the left and right retinal images for each participant would be  
197 by convolving their PSFs with our random-dot stimuli. From the resulting images, we  
198 quantified binocular image quality in two ways: the average image quality ( $ImQ_{Mean}$  –  
199 Equation 4) and the inter-ocular difference in image quality ( $ImQ_{IOD}$ ; - Equation 5; see  
200 Methods). Results from those simulations are summarized in Figure 4.

201 Figure 4A plots stereo acuity with native optics as a function of average image  
202 quality; they do not covary systematically (Pearson's  $r_5 = -0.13, -0.30, -0.43$  at 1, 2, and  
203 3cpd; all  $p > 0.34$ ). Figure 4B plots native stereo acuity as a function of inter-ocular  
204 difference in quality. Here we see a clear association: There were significant positive  
205 correlations for corrugation frequencies of 2 and 3cpd (Pearson  $r_5 = 0.89$  and  $0.91$   
206 respectively,  $p < 0.01$  in both cases) and a positive trend for 1cpd (Pearson  $r_5 = 0.55$ ,  
207  $p = 0.13$ ). In other words, participants with approximately equal native optical quality in the  
208 two eyes exhibit better stereo acuity than participants with larger interocular differences.  
209 These results reveal that the blur paradox is not specific to major defocus, but generalizes  
210 to smaller interocular differences caused higher-order aberrations.

211 Individual differences in stereo acuity under native optics were expected. But we  
212 also found similarly large inter-subject variability under AO correction (vertical spread in  
213 Figure 3B). That is, there were still notable individual differences when optical quality was  
214 essentially the same in all eyes because the optical imperfections had been corrected.  
215 Interestingly, participants' stereo acuity with AO-corrected optics was significantly  
216 correlated with their stereo acuity with their native optics at the higher corrugation  
217 frequencies (1cpd: Pearson's  $r_5 = -0.048$ ,  $p = 0.92$ ; 2cpd:  $r_5 = 0.80$ ,  $p = 0.032$ ; 3cpd:  $r_5 =$   
218  $0.86$ ,  $p = 0.013$ ).

219 Similar to our observations of stereo acuity with native optics, overall image quality  
220 was not significantly correlated with AO performance. (Figure 4C; 1cpd: Pearson's  $r_5 = -$   
221  $0.73$ ,  $p = 0.06$ ; 2cpd:  $r_5 = -0.43$ ,  $p = 0.33$ ; 3cpd:  $r_5 = -0.50$ ;  $p = 0.25$ ). But inter-ocular  
222 difference in native image quality was well correlated with AO-corrected stereo acuity  
223 even though the optical aberrations had been eliminated (Figure 4D; 1cpd: Pearson's  $r_5$   
224  $= 0.63$ ,  $p = 0.13$ ; 2cpd:  $r_5 = 0.93$ ,  $p = 0.0024$ ; 3cpd:  $r_5 = 0.99$ ,  $p < 0.0001$ ).

225 In summary, individuals who have had large interocular differences in optical  
226 quality during everyday viewing had poorer stereo acuity with their native optics but also  
227 with AO-corrected optics (i.e., when the image quality in the two eyes was essentially the  
228 same for all participants; Figure S1). The finding with corrected optics is paradoxical  
229 because the people who received the greatest improvement in inter-ocular difference,  
230 had the worst stereo acuity with AO-corrected optics. Why would people with larger inter-  
231 ocular differences have poorer stereopsis than people with smaller differences when the  
232 differences have been eliminated? We explore that question next.

233

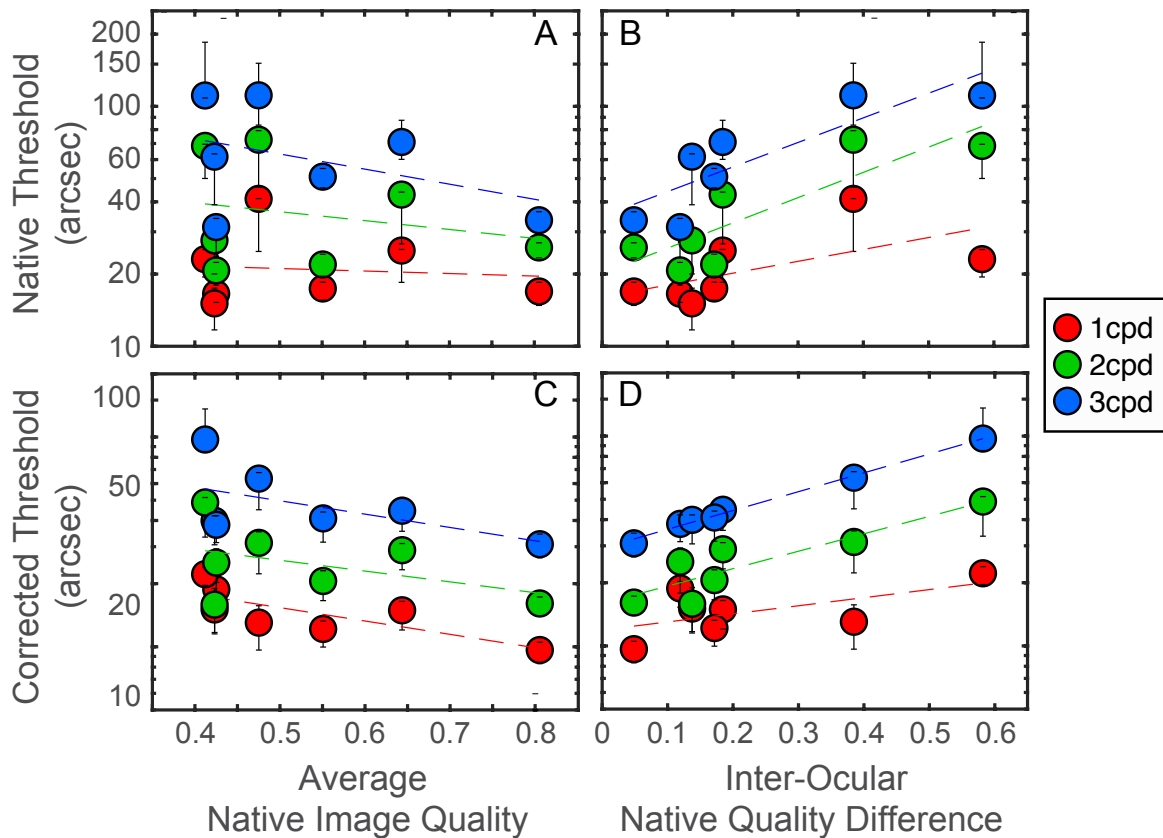

234

235 **Figure 4: Stereo thresholds and image quality.** (A and B) Stereo threshold with native optics as a function  
236 of the average ( $ImQ_{Mean}$  – Equation 4; A) and inter-ocular difference ( $ImQ_{IOD}$  – Equation 5; B) in the native  
237 image quality. The smallest discriminable disparity was plotted for each participant and corrugation  
238 frequency against the average image quality for the two eyes. Datapoints for each participant were aligned  
239 vertically. Error bars indicate  $\pm 1SD$ . (C and D) Stereo threshold with AO-corrected optics as a function of  
240 the same.

241

242 **Adaptation to native optics.** Our results show that individuals with poorer native optics  
243 (specifically, larger differences between the eyes) exhibit poorer stereo acuity even when  
244 their optics are corrected and equated in the two eyes. This inability to achieve greater  
245 improvement in stereo acuity implies that neural circuits subserving stereopsis have been  
246 shaped by the visual experience delimited by their native optics. To test this hypothesis  
247 further, we replaced the optics of one person with those of another and measured the  
248 effect on stereo acuity (Figure 5A).

249 We measured the wavefront aberrations of both eyes in six participants (Figure  
250 S2). Figure 5B shows average native image quality and inter-ocular difference in quality  
251 for each of them. We zeroed in on participant S5 who had the best average quality and  
252 the smallest inter-ocular difference in quality. Then, as indicated in Figure 5A, we used  
253 the AO system to fully correct the native optics, and simultaneously impose the optics of  
254 S5 on participants S1, S2, S3, and S4. By doing so, we made the retinal images the same  
255 for all participants, and made the quality of retinal images better than those people were  
256 used to experiencing. We then examined stereo acuity when S1-S4 viewed the stimuli  
257 with the improved but unfamiliar optics. Based on optical quality alone, we would expect  
258 that all four participants viewing the stimuli with the same optics would have the same  
259 stereo acuity and that that acuity would be the same as S5's.

260 Figure 5C shows the results. The horizontal axis plots stereo thresholds for S5 for  
261 corrugation frequencies of 1, 2, and 3cpd. The vertical axis plots thresholds for the other  
262 four participants when given the optics of S5. We emphasize that S1-S4 now had the  
263 same optics and therefore the same retinal images. The four participants with unfamiliar  
264 optics performed more poorly than S5 who was tested with his native optics. Remarkably,  
265 S4 had the largest decline even though her image quality (average and interocular  
266 difference) was most similar to S5. Although her optical quality was similar to S5's, her  
267 aberration profiles were quite different from his (Figure S2). The fact that she did relatively  
268 poorly with S5's optics indicates that familiarity with one's optics was important for fine  
269 stereopsis.

270 We also compared stereo thresholds in participants S1-S4's with their native optics  
271 and with the improved but unfamiliar optics of S5. There was no systematic difference

272 (Figure 5D). This finding suggests that there are two offsetting factors that determine how  
273 optics affects stereopsis: a benefit from improving optical quality and a detriment from  
274 having unfamiliar optics. Notably, the one participant whose stereo acuity did not improve  
275 with AO correction (Figure 3B) was among the best performers with the native optics. It  
276 was plausible that the optical improvement provided by AO was insufficient to counteract  
277 the negative adaptation effects as a result of unfamiliar optics.  
278

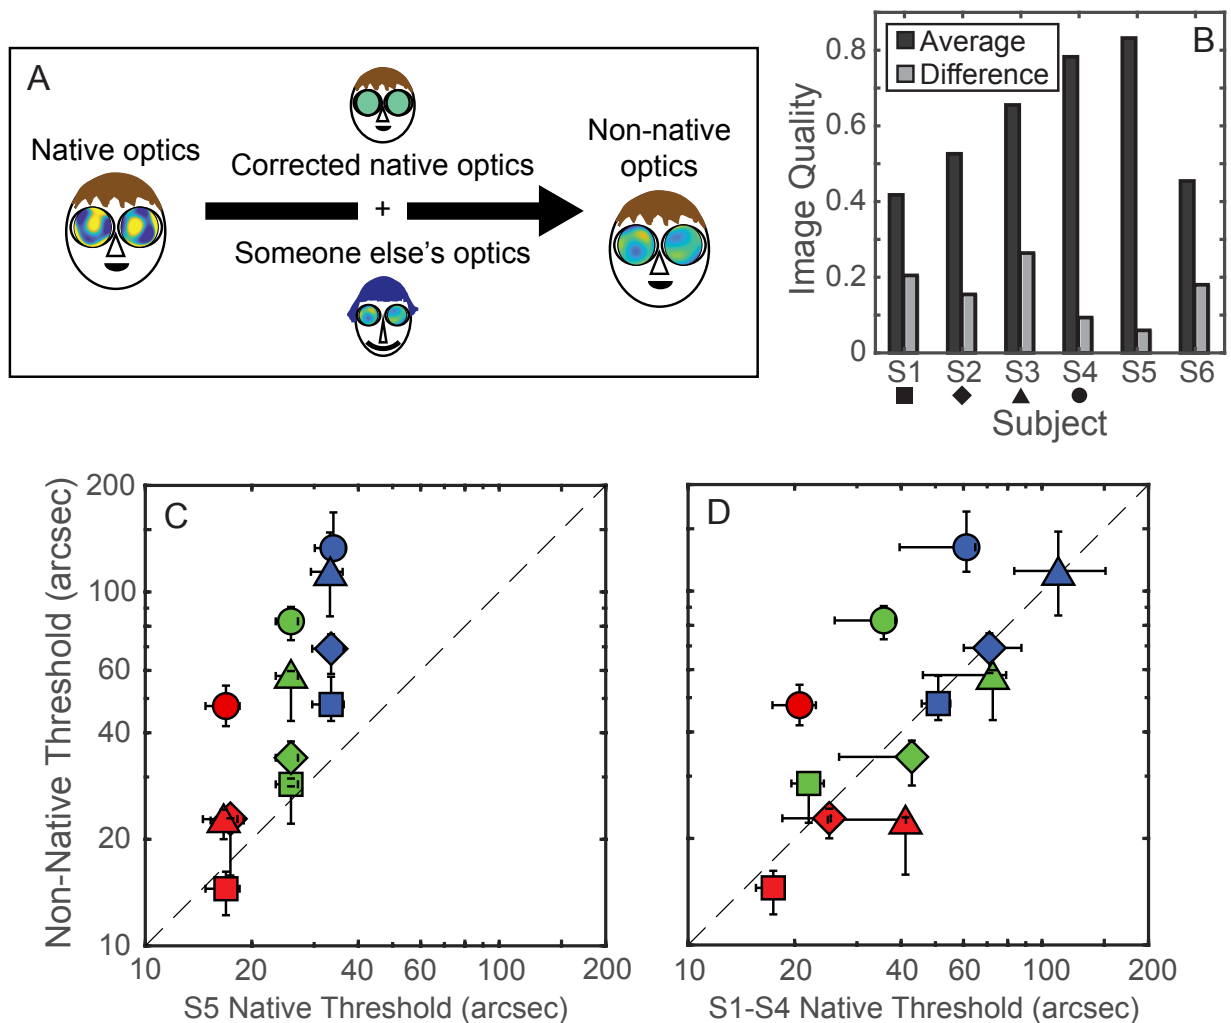

279

280 **Figure 5: Stereo thresholds with non-native optics.** (A) Experimental paradigm. (B) Image quality for  
281 each participant. Average quality (black) and inter-ocular difference in quality (gray) are plotted for each of  
282 the six participants. We imposed the optics of S5 on the eyes of S1, S2, S3, and S4. We also imposed the  
283 optics of S1 on the eyes of S6, and vice versa. (C) Stereo thresholds with non-native optics. The smallest

284 discriminable disparity is plotted for S1, S2, S3, and S4 compared with S5, whose optics were imposed. As  
285 in panel (B): ■ represents S1, ◆ S2, ▲ S3, and ● S4. Colors represent measurements at different  
286 corrugation frequencies (red for 1cpd, green for 2cpd, and blue for 3cpd). (D) Comparisons of the stereo  
287 thresholds of S1-S4 with their native optics and with S5's optics. All error bars indicate  $\pm 1SD$ .  
288

289           To further investigate the importance of familiarity, we swapped the optics between  
290 the two participants with the poorest optical quality: S1 and S6. Both participants  
291 performed significantly more poorly when given the other person's optics (particularly at  
292 high corrugation frequencies). S1's thresholds went from 17.4arc sec with her own optics  
293 to 19.2arcsec with S6's optics at 1cpd (a 10.3% increase), from 21.9 to 48.6arcsec at  
294 2cpd (122%), and from 50.7 to 94.7arcsec at 3cpd (87%). S6's thresholds exhibited even  
295 more dramatic changes. His thresholds went from 15.2arcsec with his own optics to  
296 64.9arcsec with S1's optics at 1cpd (270%), from 25.3 to 158arcsec at 2cpd (525%), and  
297 from 56.2arcsec to unmeasurable at 3cpd. These results again illustrate that stereopsis  
298 is significantly poorer when viewing stimuli with someone else's optics even when the  
299 optical quality of the participants is equivalent in magnitude. This again strongly suggests  
300 that the binocular visual system adapts to particular aspects of retinal images experienced  
301 in everyday life.

302

### 303 **Discussion**

304           The adult human visual system has operated for years with the native optics  
305 unique to the individual. The optics of our two eyes, in turn, have inscribed their  
306 uniqueness on the distributions of light formed on the two retinae: i.e., their metaphorical,  
307 unique optical signature. The information embodied in those two images, in turn, is  
308 transcribed into neural representations that are utilized in mediating every aspect of visual  
309 perception including stereopsis. The present study sheds new light on the consequences

310 of manipulating those optical signatures using AO. Our results disclose that those  
311 consequences can be advantageous (i.e., improve stereo acuity) or deleterious (i.e.,  
312 impair stereo acuity), depending on how closely AO correction conforms to the  
313 uniqueness of a given individual's native optics. The following sections consider these  
314 two consequences and their implications for understanding human binocular vision.

315

316 **AO-mediated improvement in vision.** When aberrations in the habitual optics are  
317 corrected in the laboratory using AO, the world temporarily looks noticeably different (e.g.,  
318 see [35]). Accompanying those changes in visual appearance are significant  
319 improvements in visual acuity and contrast sensitivity [5, 23, 36-38]. These improvements  
320 are not surprising given blur's well documented, deleterious impact on resolution [5, 6,  
321 38-43]. Indeed, participants with full AO correction in our experiments exhibited high  
322 visual acuity that approached the limit imposed by photoreceptor sampling frequency.  
323 Similarly, we found that correcting higher-order aberrations, which are not visually  
324 conspicuous in well-corrected eyes, improves stereo acuity, especially with higher  
325 frequency modulations in disparity.

326 The improvement in stereo acuity with AO-corrected optics we observed stands in  
327 contrast to results from an earlier study out of our lab [26] suggesting that higher-order  
328 aberrations have essentially no impact on stereo acuity. We believe that procedural  
329 differences are responsible for the difference in findings. The earlier study used optical  
330 phase plates to achieve static correction of higher-order aberrations, whereas the present  
331 study used dynamic, real-time AO correction which, unlike the static phase plate,  
332 compensates for eye movements and thus mitigates optical effects of pupil/image



333 misalignment that can happen when viewing with a static correction. We are thus  
334 confident that the improved AO device and testing procedures employed in this study are  
335 responsible for revealing a genuine improvement in stereo acuity attributable to  
336 elimination of higher-order aberrations. This, in turn, raises the following question: how  
337 does this improvement come about?

338

339 **AO improves stereopsis.** Our results reveal that levels of stereo acuity achieved with  
340 AO exceed those measured when viewing with normal optics. This achievement is  
341 remarkable given that the limits of human stereopsis assessed with natural optics already  
342 qualifies as a form of hyperacuity: i.e., disparity resolution that exceeds the sampling limits  
343 imposed by the photoreceptor mosaic [14, 34, 44-47].

344         What is the basis of this improvement in stereopsis with AO-correction? It is natural  
345 to wonder whether the improvement might arise from more stable, accurate vergence  
346 fixation prompted by the enhanced clarity of edge information in the AO-corrected retinal  
347 images [48]. We doubt, however, that enhanced vergence stability can account for our  
348 results because earlier work on human stereopsis reveals that i) vergence accuracy is  
349 unaffected by bandpass spatial-frequency filtering of texture stereograms, a maneuver  
350 that mimics blur [49], and ii) fixation disparity (a proxy for vergence error that affects  
351 stereopsis [50]) is essentially the same when viewing stereo gratings ranging in spatial  
352 frequency from 0.5 to 8cpd [51]. Instead, we are inclined to attribute the improved  
353 stereopsis with AO-corrected images to neural processes involved in cortical disparity  
354 computation per se.

355         In this context, then, how does elimination of higher-order optical aberrations

356 enable superior stereo acuity, a cortical process? To tackle that question, we first need  
357 to consider the nature of the disparities arising from viewing conditions simulating 3D  
358 objects (i.e., a corrugated textured surface in our case) seen from two slightly different  
359 viewpoints. There are various ways to conceptualize the nature of those disparities [52,  
360 53]. One is in terms of positional disparities between pairs of matching features. A  
361 convenient means for extracting that information would be with location-specific cortical  
362 receptive fields that function as spatial-frequency selective neural filters [54]. Another,  
363 complementary definition of disparity focuses on disparity in the phase domain [55]. An  
364 impetus for this idea comes from physiological studies showing that binocular cortical  
365 neurons are sensitive to different phase shifts within pairs of monocular images [56, 57].  
366 Several groups have made the case for the joint involvement of both forms of disparity in  
367 mediation of stereopsis [58, 59]. Our aim here is not to critique the different models of  
368 stereopsis but, rather, to surmise how AO, through the elimination of higher-order  
369 aberrations ordinarily embedded in each eye's retinal image, might augment the  
370 luminance distribution information defining those images.

371 Higher-order aberrations of the eye's optics degrade retinal images in three ways:  
372 1) they reduce contrast over a range of spatial frequencies, 2) they eliminate very high  
373 spatial frequencies altogether, and 3) they alter phase relationships among spatial  
374 frequencies that crucially define spatial information portrayed within images. The  
375 disruption of this phase congruency causes a significant loss in key structural elements  
376 such as sharp edges that make features hard to match accurately between the eyes. In  
377 that way, detecting fine positional disparities become difficult. Correcting the aberrations  
378 with AO recovers the phase spectra of low spatial frequencies. Adding the phases of high-

379 frequency components that were unavailable before correction enables phase disparity  
380 computation from a larger spectrum of channels. It is plausible that this improvement in  
381 both contrast and phase congruency in a broadband stimulus like random-dot  
382 stereograms allows the visual system to detect even smaller disparities than those  
383 resolved with well-focused normal optics. It is also important to note that further  
384 investigation is required to learn whether the binocular system can compensate for the  
385 phase disruption through long-term adaptation to the eyes' native optics and if so, the  
386 extent to which the improvement in human stereopsis with perfect optics is compromised  
387 by phase adaptation [60, 61].

388         Putting aside those speculations about the bases of AO's contribution to improved  
389 stereo acuity, we next turn to a second intriguing feature of our results: the consequence  
390 of viewing the world through someone else's optics that was unexpectedly not beneficial  
391 despite improvements relative to the participant's own optics.

392

393 **Individual differences in the impact of AO viewing.** As noted earlier when discussing  
394 the blur paradox, differences in the sharpness of images viewed by the two eyes  
395 adversely affects stereo acuity (e.g., [62]) suggesting that matching similar optical quality  
396 between the eyes is critical for fine stereopsis. We found that the improvement in stereo  
397 acuity measured with AO (i.e., aberration free) was *inversely* related to an individual's  
398 interocular difference in their native, habitually experienced optics. Why would that be the  
399 case?

400         Perhaps a given individual's visual nervous system adapts to the unique optical  
401 profile after a long period of time. This neural adaptation to one's own optics would

402 improve vision, including stereopsis, under natural, everyday viewing [63], but in a  
403 manner specific to the aberrations present in the optics of each eye (e.g. [25]). Viewing  
404 with AO correction disrupts that previously stable relation between optical profile and the  
405 visual nervous system, with the degree of disruption presumably being greater for those  
406 with more pronounced higher-order aberrations. This is just what we found for both visual  
407 and stereo acuity (Figs. 2D and 4D). Also consistent with this hypothesis based on neural  
408 adaptation were the results from our experiment in which participants were tested while  
409 viewing with the optics of another person: this produced poorer performance, even though  
410 the non-habitual optics were similar or even better than a person's own.

411 This kind of adaptation to blur is not limited to the laboratory. In the eye clinic, it is a  
412 common practice not to prescribe full eyewear correction (e.g., for astigmatism) so as to  
413 avoid short-term visual discomfort.

414 **Implications for neural plasticity and clinical relevance.** The visual circuitry underlying  
415 stereovision was traditionally thought to reach maturity during childhood, beyond which  
416 little plasticity remains [64, 65]. However, there have been anecdotal instances of post-  
417 pubertal adults recovering stereovision, the most famous of whom is "Stereo-Sue" [12]  
418 and more recently Bruce Bridgeman [66]. Using more controlled training paradigms,  
419 stereoblind people can also recover stereovision to certain extents [67, 68] implying that  
420 the binocular system is more plastic than previously thought. We assume that people  
421 adapt because the optics changes gradually throughout the lifespan [69, 70], and yet  
422 there appears to be a benefit when viewing with their own native state at the time of  
423 testing. We found that thresholds with AO correlate with inter-ocular image quality  
424 difference and less so with the average image quality in the native optics, presumably

425 due to long-term adaptation. It is conceivable that the effects are even more substantial  
426 in participants with highly aberrated eyes such as those with irregular corneal surface  
427 profiles (keratoconus). Keratoconus is a corneal disease that emerges in otherwise  
428 normal-sighted individuals during the second or third decade of life and causes very large  
429 aberrations that are usually quite different between the two eyes. We observed that these  
430 patients even with AO have no or very poor stereopsis. Various advanced vision  
431 correction methods [71, 72] that provide supernormal vision are currently available or  
432 under development. It is of scientific and clinical interest to address the following question:  
433 can normal binocular function be recovered by having the visual system become re-  
434 adapted to the new, improved optics over time and if so, how quickly can this neural re-  
435 adaptation occur?

436

## 437 **Methods**

438 **Participants.** Eight adults participated, including the first and last authors. The gender,  
439 age, and eyewear prescription of each individual are provided in Table S1. The  
440 participants had eye examinations within the past year and had normal vision while  
441 wearing their usual prescription, if any: 20/20 Snellen acuity or better and 40arcsec stereo  
442 threshold or better (Randot stereo test). The human participants' protocol was approved  
443 by the University of Rochester Research Review Board. All participants signed an  
444 informed consent form before participating. Prior to testing, 1% tropicamide solution was  
445 administered to both eyes to produce short-duration mydriasis (pupil dilation) and  
446 cycloplegia (paralysis of accommodation).

447

448 **Apparatus.** The binocular AO system used in this study has been described in detail  
449 elsewhere [43]. The apparatus can measure and completely correct and/or manipulate  
450 lower- and higher-order optical aberrations while visual performance was being measured  
451 with images projected separately to the two eyes. The apparatus consisted of two  
452 identical systems, one for each eye. Each had a Shack-Hartmann wavefront sensor that  
453 measured the eye's aberrations from the retinal reflections of a super-luminescent diode  
454 at 850nm (Inphenix Inc.). Each wavefront sensor communicated with a deformable mirror  
455 (DM-97-15, ALPAO) that controlled the amount and type of optical aberration by  
456 conforming its shape to yield the desired wavefront for each eye in real time at 12Hz.

457 Aberrations were corrected for 6mm pupil diameters while the actual pupil sizes  
458 during testing were restricted to 5.8mm using artificial apertures placed at the pupil-  
459 conjugate planes. Participants rested their heads on a chin rest and a pair of temple  
460 mounts. The rest and mounts could be translated by a 3-axis motorized stage to center  
461 both pupils as monitored by a pair of pupil cameras. The same pair of pupil cameras  
462 monitored eye movements throughout the experiments to make sure that the visual axis  
463 was always aligned to the optical axis of the system. Inter-pupillary distance was set for  
464 each participant using a translation stage. Left- and right-eye stimuli were projected on to  
465 the retinae by two digital light-processing projectors (DLPDLCR4710EVM-G2, Texas  
466 Instrument Inc.), one for each eye. The stimuli were 8.4° wide by 4.7° high spanning  
467 1920x1080 pixels. Each pixel subtended 0.26arcmin. Root mean square wavefront errors  
468 as well as image quality during AO correction of individual eyes are provided in Figure  
469 S1.

470

471 **Visual acuity.** Monocular visual acuity was measured with the Tumbling E task [73]. The  
472 black letter E was presented for 250ms in one of four orientations on a white background  
473 of 120cd/m<sup>2</sup>. Participants indicated the perceived orientation in a four-alternative, forced-  
474 choice (4-AFC) response (Figure S3). Auditory feedback was provided for each correct  
475 response. Letter size in terms of stroke width ranged from 0.3 to 50arcmin (Snellen 20/6  
476 to 20/1000) and varied over a 40-trial sequence according to the QUEST+ adaptive  
477 staircase method [74]. The procedure was repeated three times (120 trials total) to obtain  
478 the letter size associated with 72.4% correct using the best-fitting cumulative Weibull  
479 function and Bayesian estimation provided by QUEST+.

480

481 **Stereo acuity.** Binocular stereo thresholds were measured using random-dot  
482 stereograms that portrayed a densely textured surface with disparity-defined sinusoidal  
483 depth corrugations (Figure 1, 3, S2B; [31]). We used such stimuli because they allow one  
484 to eliminate monocular cues and because blur affects the ability to see the depth  
485 corrugation [75]. A trial started with the presentation of a fixation target consisting of a  
486 small dot and four diagonal lines seen by both eyes along with vertical and horizontal  
487 nonius lines seen by one or the other eye. The parts that were seen by both eyes aided  
488 accurate alignment of the eyes. The parts seen only by one eye or the other allowed the  
489 participant to assess the accuracy of alignment. When the fixation target was properly  
490 fused, it looked like one dot and eight lines. Once fusion was achieved, participants  
491 initiated stimulus presentation with a key press.

492 Each dot in the random-dot stereogram was a small bright square (83.5 x  
493 83.5arcsec) on an otherwise dark background. The dot pattern was generated by first

494 populating a hexagonal grid at nodal points spaced 110arcsec apart. Each dot was then  
495 randomly displaced from the nodal point with a direction drawn from a uniform distribution  
496 ranging from 0 to  $2\pi$  and a distance from 0 to 55arcsec. Dot density was 180 dots/deg<sup>2</sup>  
497 in a super-Gaussian window ( $W$ ):

$$498 \quad W = e^{\left(-\left(\frac{(x-x_0)^2}{2\cdot\sigma^2} + \frac{(y-y_0)^2}{2\cdot\sigma^2}\right)^P\right)} \quad (1)$$

499 where  $P = 5$ , and  $\sigma = 0.5^\circ$ . The values  $[x_0, y_0]$  are nodal points and  $[x, y]$  are horizontal  
500 and vertical screen coordinates. Edges of the circular window were blended into the  
501 background so that the only fusion cues were the random dots themselves.

502 Left and right images were created from the random-dot pattern by displacing each  
503 dot in opposite directions by half its horizontal peak-to-trough disparity ( $A$ ):

$$504 \quad \text{Disparity}(x, y) = \frac{A}{2} \cos(2\pi f(y \cos \theta - x \sin \theta) + \phi) \quad (2)$$

505 where  $f$ ,  $\phi$ , and  $\theta$  are the spatial frequency, phase, and orientation of the disparity-defined  
506 sinusoidal corrugation, respectively. Thresholds (the smallest discriminable disparity)  
507 were measured for corrugation frequencies of 1, 2, and 3cpd. The corrugation presented  
508 on each trial had a random phase between 0 and  $2\pi$  and an orientation of either  $+10^\circ$   
509 (slightly anti-clockwise) or  $-10^\circ$  (slightly clockwise) from the horizontal. Participants  
510 indicated which of the two orientations were presented on each trial, guessing if  
511 necessary (2-AFC). Each stimulus was displayed for a maximum of 10s, but participants  
512 were instructed to respond as soon as they were confident of their judgment. Most  
513 responses were completed under 1s. The peak-to-trough disparity was varied from trial  
514 to trial according to the method of constant stimuli. Five disparity amplitudes (determined  
515 for each person in pilot testing) were each presented 40 times for a total of 200 trials per



516 condition. We did not present disparity amplitudes that exceeded the disparity-gradient  
517 limit [75, 76]. Auditory feedback was provided when a correct response was made. Data  
518 for each corrugation frequency were fitted with a cumulative Weibull function using  
519 Psignifit [77]. Stereo thresholds were defined as disparities that produced 81.6% correct  
520 responses.

521

522 **Retinal-image quality.** The point-spread function (PSF) represents how a point source  
523 of light is blurred by the eye's aberrations on the retina. PSFs were calculated for the left  
524 ( $PSF_{LE}$ ) and right eyes ( $PSF_{RE}$ ) of each participant when their lower-order (spherical and  
525 cylindrical) refractive errors were corrected (using clinically prescribed eyewear), but their  
526 higher-order aberrations were not. The resultant PSFs were a combination of the higher-  
527 order aberrations as well as any residual lower-order ones. We quantified retinal-image  
528 quality in the following ways. For the visual acuity experiment, we first generated  
529 simulated retinal images by convolving an upright 20/20 Snellen E with the eye's PSF.  
530 We then correlated the obtained images with the original perfect images. Specifically, we  
531 calculated the two-dimensional cross-correlation and took the maximum as the image-  
532 quality value [78]. The metric values can range from -1 to +1 where +1 would mean perfect  
533 image quality, unadulterated by aberrations and diffraction, and -1 would indicate  
534 anticorrelated image quality. We used the same approach for the stereo experiment, but  
535 by convolving a random-dot pattern presented to an eye with the eye's PSF. We did this  
536 for 10 different instances of random-dot patterns. Left-eye image quality ( $ImQ_{LE}$ ) is:

537 
$$ImQ_{LE} = \frac{\sum_{i=1}^n \max((PSF_{LE} * RDP_i) * RDP_i)}{n} \quad (3)$$

538 where  $RDP$  is the random-dot pattern,  $n = 10$  represents the 10 instances of  $RDPs$ ,  $*$  is  
539 2-D convolution,  $\star$  is 2-D cross-correlation, and  $\max(\star)$  provides the maximum of the 2-D  
540 cross-correlation matrix. Right-eye quality ( $ImQ_{RE}$ ) was calculated the same way.  
541 We also calculated the average image quality ( $ImQ_{Mean}$ ) defined as the mean of the two  
542 eyes' quality indices across the 10 presentation instances:

$$543 \quad ImQ_{Mean} = \frac{ImQ_{LE} + ImQ_{RE}}{2} \quad (4)$$

544 Finally, an index of the interocular difference in image quality ( $ImQ_{IOD}$ ) was derived  
545 by cross-correlating the left and right retinal images, and then subtracting the resultant  
546 from unity:

$$547 \quad ImQ_{IOD} = \frac{1 - \sum_{i=1}^n \max((PSF_{LE} * RDP_i) \star (PSF_{RE} * RDP_i))}{n} \quad (5)$$

548

### 549 **Acknowledgements**

550 We thank Gregory DeAngelis for helpful comments on the manuscript. This work was  
551 supported by NIH Grant EY014999 and Research to Prevent Blindness (RPB).

552

### 553 **Author Contributions**

554 CJN, MSB and GY designed the research. CJN conducted the research. CJN and DT  
555 analyzed data. CJN, RB, MSB, DT and GY wrote the paper.

556

557 The authors declare no competing interests.

558

559

## 560 **References**

- 561 1. Liang, J. and D.R. Williams, *Aberrations and retinal image quality of the normal human eye*. J Opt Soc Am A  
562 Opt Image Sci Vis, 1997. **14**(11): p. 2873-83.
- 563 2. M., M.J., *Molyneux's Question: Vision, Touch and the Philosophy of Perception*. Vol. 1st Edition. 1977, The  
564 United States of America: Cambridge University Press.
- 565 3. Liang, J., D.R. Williams, and D.T. Miller, *Supernormal vision and high-resolution retinal imaging through*  
566 *adaptive optics*. Journal of the Optical Society of America A, 1997. **14**(11): p. 2884-2892.
- 567 4. Marcos, S., et al., *Vision science and adaptive optics, the state of the field*. Vision Research, 2017. **132**: p. 3-  
568 33.
- 569 5. Yoon, G.Y. and D.R. Williams, *Visual performance after correcting the monochromatic and chromatic*  
570 *aberrations of the eye*. J Opt Soc Am A Opt Image Sci Vis, 2002. **19**(2): p. 266-75.
- 571 6. Marcos, S., et al., *Influence of adaptive-optics ocular aberration correction on visual acuity at different*  
572 *luminances and contrast polarities*. Journal of Vision, 2008. **8**(13): p. 1-1.
- 573 7. Artal, P., et al., *Visual effect of the combined correction of spherical and longitudinal chromatic aberrations*.  
574 Opt Express, 2010. **18**(2): p. 1637-48.
- 575 8. Cumming, B.G. and G.C. DeAngelis, *The physiology of stereopsis*. Annu Rev Neurosci, 2001. **24**: p. 203-38.
- 576 9. Blake, R. and H.R. Wilson, *Neural models of stereoscopic vision*. Trends Neurosci, 1991. **14**(10): p. 445-52.
- 577 10. Barlow, H.B., C. Blakemore, and J.D. Pettigrew, *The neural mechanism of binocular depth discrimination*. J  
578 Physiol, 1967. **193**(2): p. 327-42.
- 579 11. Wheatstone, C., *Contributions to the physiology of vision*—Part the first. On some remarkable, and hitherto  
580 unobserved, phenomena of binocular vision. Philosophical Transactions of the Royal Society of London,  
581 1838. **128**: p. 371-394.
- 582 12. Barry, S.R., *Fixing My Gaze: A Scientist's Journey into Seeing in Three Dimensions*. 2009, New York, USA:  
583 Basic Books.
- 584 13. Wood, I.C., *Stereopsis with spatially-degraded images*. Ophthalmic Physiol Opt, 1983. **3**(3): p. 337-40.
- 585 14. Westheimer, G. and S.P. McKee, *Stereoscopic acuity with defocused and spatially filtered retinal images*.  
586 Journal of the Optical Society of America, 1980. **70**(7): p. 772-778.
- 587 15. Odell, N.V., et al., *The effect of induced monocular blur on measures of stereoacuity*. J aapos, 2009. **13**(2):  
588 p. 136-41.
- 589 16. Nabie, R., et al., *Effect of artificial anisometropia in dominant and nondominant eyes on stereoacuity*. Can J  
590 Ophthalmol, 2017. **52**(3): p. 240-242.
- 591 17. Schor, C. and T. Heckmann, *Interocular differences in contrast and spatial frequency: Effects on stereopsis*  
592 *and fusion*. Vision Research, 1989. **29**(7): p. 837-847.
- 593 18. Fernández, E.J., et al., *Impact on stereo-acuity of two presbyopia correction approaches: monovision and*  
594 *small aperture inlay*. Biomedical optics express, 2013. **4**(6): p. 822-830.
- 595 19. Evans, B.J., *Monovision: a review*. Ophthalmic Physiol Opt, 2007. **27**(5): p. 417-39.
- 596 20. Schwarz, C., et al., *Comparison of binocular through-focus visual acuity with monovision and a small*  
597 *aperture inlay*. Biomedical optics express, 2014. **5**(10): p. 3355-3366.
- 598 21. Porter, J., et al., *Monochromatic aberrations of the human eye in a large population*. J Opt Soc Am A Opt  
599 Image Sci Vis, 2001. **18**(8): p. 1793-803.
- 600 22. Sawides, L., et al., *Dependence of subjective image focus on the magnitude and pattern of high order*  
601 *aberrations*. Journal of Vision, 2012. **12**(8): p. 4-4.
- 602 23. Sabesan, R. and G. Yoon, *Neural compensation for long-term asymmetric optical blur to improve visual*  
603 *performance in keratoconic eyes*. Invest Ophthalmol Vis Sci, 2010. **51**(7): p. 3835-9.
- 604 24. Artal, P., et al., *Neural compensation for the eye's optical aberrations*. Journal of Vision, 2004. **4**(4): p. 4-4.
- 605 25. Kompaniež, E., et al., *Adaptation to interocular differences in blur*. J Vis, 2013. **13**(6): p. 19.
- 606 26. Vlaskamp, B.N.S., G. Yoon, and M.S. Banks, *Human Stereopsis Is Not Limited by the Optics of the Well-*  
607 *Focused Eye*. The Journal of Neuroscience, 2011. **31**(27): p. 9814-9818.
- 608 27. Sabesan, R. and G. Yoon, *Visual performance after correcting higher order aberrations in keratoconic eyes*.  
609 Journal of Vision, 2009. **9**(5): p. 6-6.
- 610 28. Ahnelt, P.K., *The photoreceptor mosaic*. Eye (Lond), 1998. **12 ( Pt 3b)**: p. 531-40.

- 611 29. Jonas, J.B., U. Schneider, and G.O. Naumann, *Count and density of human retinal photoreceptors*. Graefes  
612 Arch Clin Exp Ophthalmol, 1992. **230**(6): p. 505-10.
- 613 30. Kane, D., P. Guan, and M.S. Banks, *The limits of human stereopsis in space and time*. J Neurosci, 2014. **34**(4):  
614 p. 1397-408.
- 615 31. Tyler, C.W., *Depth perception in disparity gratings*. Nature, 1974. **251**(5471): p. 140-142.
- 616 32. Bosten, J.M., et al., *A population study of binocular function*. Vision Res, 2015. **110**(Pt A): p. 34-50.
- 617 33. Peterzell, D.H., et al., *Thresholds for sine-wave corrugations defined by binocular disparity in random dot*  
618 *stereograms: Factor analysis of individual differences reveals two stereoscopic mechanisms tuned for spatial*  
619 *frequency*. Vision Research, 2017. **141**: p. 127-135.
- 620 34. Westheimer, G. and S.P. McKee, *Stereogram design for testing local stereopsis*. Invest Ophthalmol Vis Sci,  
621 1980. **19**(7): p. 802-9.
- 622 35. Artal, P., et al., *Neural compensation for the eye's optical aberrations*. J Vis, 2004. **4**(4): p. 281-7.
- 623 36. Sabesan, R., A. Barbot, and G. Yoon, *Enhanced neural function in highly aberrated eyes following perceptual*  
624 *learning with adaptive optics*. Vision Research, 2017. **132**: p. 78-84.
- 625 37. Rossi, E.A., et al., *Visual performance in emmetropia and low myopia after correction of high-order*  
626 *aberrations*. Journal of Vision, 2007. **7**(8): p. 14-14.
- 627 38. Schwarz, C., et al., *Binocular visual acuity for the correction of spherical aberration in polychromatic and*  
628 *monochromatic light*. Journal of Vision, 2014. **14**(2): p. 8-8.
- 629 39. Campbell, F.W. and D.G. Green, *Optical and retinal factors affecting visual resolution*. The Journal of  
630 physiology, 1965. **181**(3): p. 576-593.
- 631 40. Liang, J., D.R. Williams, and D.T. Miller, *Supernormal vision and high-resolution retinal imaging through*  
632 *adaptive optics*. J Opt Soc Am A Opt Image Sci Vis, 1997. **14**(11): p. 2884-92.
- 633 41. Li, S., et al., *Effects of Monochromatic Aberration on Visual Acuity Using Adaptive Optics*. Optometry and  
634 Vision Science, 2009. **86**(7).
- 635 42. Rocha, K.M., et al., *Enhanced visual acuity and image perception following correction of highly aberrated*  
636 *eyes using an adaptive optics visual simulator*. J Refract Surg, 2010. **26**(1): p. 52-6.
- 637 43. Sabesan, R., L. Zheleznyak, and G. Yoon, *Binocular visual performance and summation after correcting*  
638 *higher order aberrations*. Biomed Opt Express, 2012. **3**(12): p. 3176-89.
- 639 44. McKee, S.P., *The spatial requirements for fine stereoacuity*. Vision Res, 1983. **23**(2): p. 191-8.
- 640 45. Stevenson, S.B., L.K. Cormack, and C.M. Schor, *Hyperacuity, superresolution and gap resolution in human*  
641 *stereopsis*. Vision Research, 1989. **29**(11): p. 1597-1605.
- 642 46. Westheimer, G., *Editorial: Visual acuity and hyperacuity*. Invest Ophthalmol, 1975. **14**(8): p. 570-2.
- 643 47. Westheimer, G., *Cooperative neural processes involved in stereoscopic acuity*. Exp Brain Res, 1979. **36**(3): p.  
644 585-97.
- 645 48. Otero-Millan, J., S.L. Macknik, and S. Martinez-Conde, *Fixational eye movements and binocular vision*.  
646 Frontiers in integrative neuroscience, 2014. **8**: p. 52-52.
- 647 49. Mowforth, P., J.E. Mayhew, and J.P. Frisby, *Vergence eye movements made in response to spatial-frequency-*  
648 *filtered random-dot stereograms*. Perception, 1981. **10**(3): p. 299-304.
- 649 50. Ukwade, M.T., H.E. Bedell, and R.S. Harwerth, *Stereopsis is perturbed by vergence error*. Vision Res, 2003.  
650 **43**(2): p. 181-93.
- 651 51. Harwerth, R.S., E.L. Smith, 3rd, and J. Siderov, *Behavioral studies of local stereopsis and disparity vergence*  
652 *in monkeys*. Vision Res, 1995. **35**(12): p. 1755-70.
- 653 52. Qian, N. and S. Mikaelian, *Relationship Between Phase and Energy Methods for Disparity Computation*.  
654 Neural Computation, 2000. **12**(2): p. 279-292.
- 655 53. Blake, R. and H. Wilson, *Binocular vision*. Vision Res, 2011. **51**(7): p. 754-70.
- 656 54. Fleet, D.J., H. Wagner, and D.J. Heeger, *Neural encoding of binocular disparity: Energy models, position shifts*  
657 *and phase shifts*. Vision Research, 1996. **36**(12): p. 1839-1857.
- 658 55. Lappin, J.S., *What is binocular disparity?* Frontiers in psychology, 2014. **5**: p. 870-870.
- 659 56. Ohzawa, I., G.C. DeAngelis, and R.D. Freeman, *Stereoscopic depth discrimination in the visual cortex:*  
660 *neurons ideally suited as disparity detectors*. Science, 1990. **249**(4972): p. 1037-41.
- 661 57. Tsao, D.Y., B.R. Conway, and M.S. Livingstone, *Receptive Fields of Disparity-Tuned Simple Cells in Macaque*  
662 *V1. Neuron*, 2003. **38**(1): p. 103-114.

- 663 58. Lappin, J.S. and W.D. Craft, *Definition and detection of binocular disparity*. Vision Res, 1997. **37**(21): p. 2953-  
664 74.
- 665 59. Read, J.C.A. and B.G. Cumming, *Sensors for impossible stimuli may solve the stereo correspondence problem*.  
666 Nature Neuroscience, 2007. **10**(10): p. 1322-1328.
- 667 60. Barbot, A., et al., *Neural adaptation to optical aberrations through phase compensation*. Journal of Vision,  
668 2020. **20**(11): p. 1130-1130.
- 669 61. Barbot, A., et al., *Long-term adaptation to ocular aberrations alters visual processing of spatial frequency*  
670 *information*. Journal of Vision, 2016. **16**(12): p. 554-554.
- 671 62. Lam, A.K.C., et al., *Effect of naturally occurring visual acuity differences between two eyes in stereoacuity*.  
672 Ophthalmic and Physiological Optics, 1996. **16**(3): p. 189-195.
- 673 63. Webster, M.A., M.A. Georgeson, and S.M. Webster, *Neural adjustments to image blur*. Nat Neurosci, 2002.  
674 **5**(9): p. 839-40.
- 675 64. Daw, N.W., *Critical Periods and Amblyopia*. Archives of Ophthalmology, 1998. **116**(4): p. 502-505.
- 676 65. Banks, M.S., R.N. Aslin, and R.D. Letson, *Sensitive period for the development of human binocular vision*.  
677 Science, 1975. **190**(4215): p. 675.
- 678 66. Bridgeman, B., *Restoring Adult Stereopsis: A Vision Researcher's Personal Experience*. Optometry and Vision  
679 Science, 2014. **91**(6).
- 680 67. Ding, J. and D.M. Levi, *Recovery of stereopsis through perceptual learning in human adults with abnormal*  
681 *binocular vision*. Proceedings of the National Academy of Sciences, 2011. **108**(37): p. E733-E741.
- 682 68. Vedamurthy, I., et al., *A dichoptic custom-made action video game as a treatment for adult amblyopia*.  
683 Vision Res, 2015. **114**: p. 173-87.
- 684 69. Athaide, H.V., M. Campos, and C. Costa, *Study of ocular aberrations with age*. Arq Bras Oftalmol, 2009.  
685 **72**(5): p. 617-21.
- 686 70. Amano, S., et al., *Age-related changes in corneal and ocular higher-order wavefront aberrations*. Am J  
687 Ophthalmol, 2004. **137**(6): p. 988-92.
- 688 71. Marsack, J.D., et al., *Wavefront-guided scleral lens correction in keratoconus*. Optom Vis Sci, 2014. **91**(10):  
689 p. 1221-30.
- 690 72. Sabesan, R., et al., *Wavefront-guided scleral lens prosthetic device for keratoconus*. Optom Vis Sci, 2013.  
691 **90**(4): p. 314-23.
- 692 73. Lovie-Kitchin, J.E., *Validity and reliability of visual acuity measurements*. Ophthalmic Physiol Opt, 1988. **8**(4):  
693 p. 363-70.
- 694 74. Watson, A.B., *QUEST+: A general multidimensional Bayesian adaptive psychometric method*. Journal of  
695 Vision, 2017. **17**(3): p. 10-10.
- 696 75. Banks, M.S., S. Gepshtein, and M.S. Landy, *Why Is Spatial Stereoresolution So Low?* The Journal of  
697 Neuroscience, 2004. **24**(9): p. 2077.
- 698 76. Burt, P. and B. Julesz, *A disparity gradient limit for binocular fusion*. Science, 1980. **208**(4444): p. 615-7.
- 699 77. Wichmann, F.A. and N.J. Hill, *The psychometric function: I. Fitting, sampling, and goodness of fit*. Perception  
700 & Psychophysics, 2001. **63**(8): p. 1293-1313.
- 701 78. Zheleznyak, L., et al., *Impact of corneal aberrations on through-focus image quality of presbyopia-correcting*  
702 *intraocular lenses using an adaptive optics bench system*. J Cataract Refract Surg, 2012. **38**(10): p. 1724-33.
- 703
